# Supplementary material
Source: publisher figshare collection journal article supplement (https://acs.figshare.com/ndownloader/files/17591636)
Supplement: Supplementary file 1 [file 17591636]

## Supporting Information

# **Chitosan-g-Poly(Acrylic Acid) Copolymer and Its Sodium Salt as Stabilized Aqueous Binders for Silicon Anodes in Lithium-Ion Batteries**

Yang Gao,<sup>†</sup> Xiaotao Qiu,<sup>†</sup> Xiuli Wang,<sup>†</sup> Aiqun Gu,<sup>†</sup> Li Zhang,<sup>†</sup> Xianchun Chen,<sup>‡\*</sup> Junfeng Li,<sup>§</sup> Zili Yu<sup>†\*</sup>

<sup>†</sup> Analytical and Testing Center, Sichuan University, No.29 Wangjiang Road, Wuhou District, Chengdu, Sichuan 610064, People's Republic of China

<sup>‡</sup> College of Materials Science and Engineering, Sichuan University, No.29 Wangjiang Road, Wuhou District, Chengdu, Sichuan 610064, People's Republic of China

<sup>§</sup> Department of Materials Science & Engineering, Chengdu University of Technology, No.1 Dongsan Road, Erxianqiao, Chonghua District, Chengdu, 610059, People's Republic of China

\*Corresponding author.

E-mail address: chenxianchun@scu.edu.cn (X. Chen); ziliyu@163.com (Z. Yu).

No. of pages: 10

No. of Tables: 02

No. of Figures: 11

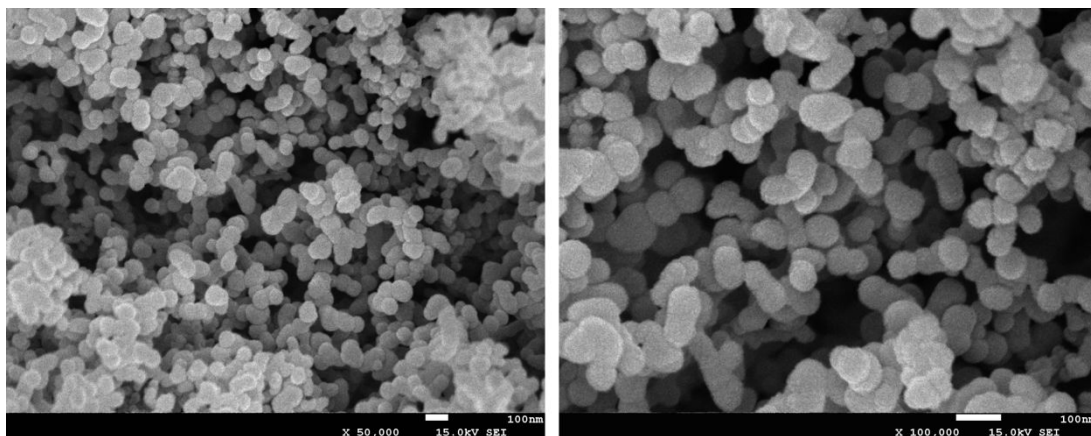

**Figure S1.** SEM images of Si nanoparticles.

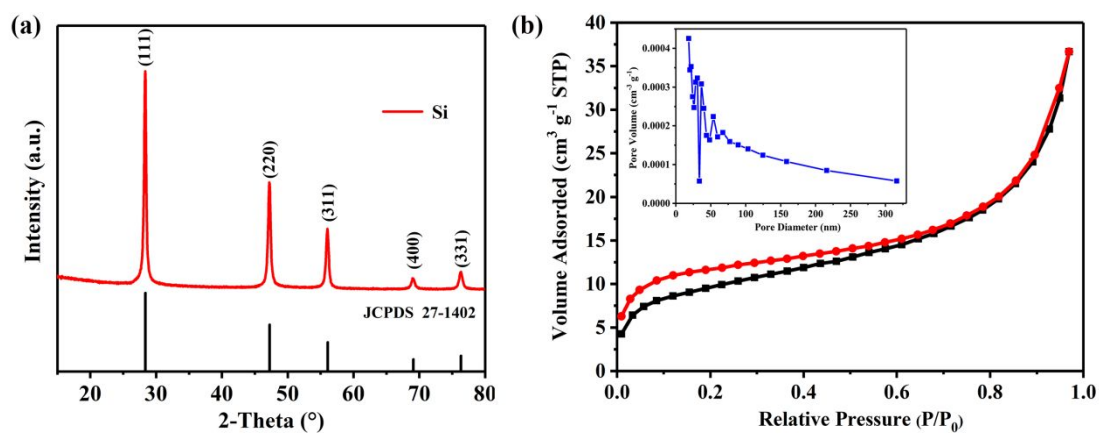

**Figure S2.** XRD pattern (a) and nitrogen adsorption-desorption isotherm and the (inset) pore size distribution (b) of Si nanoparticles.

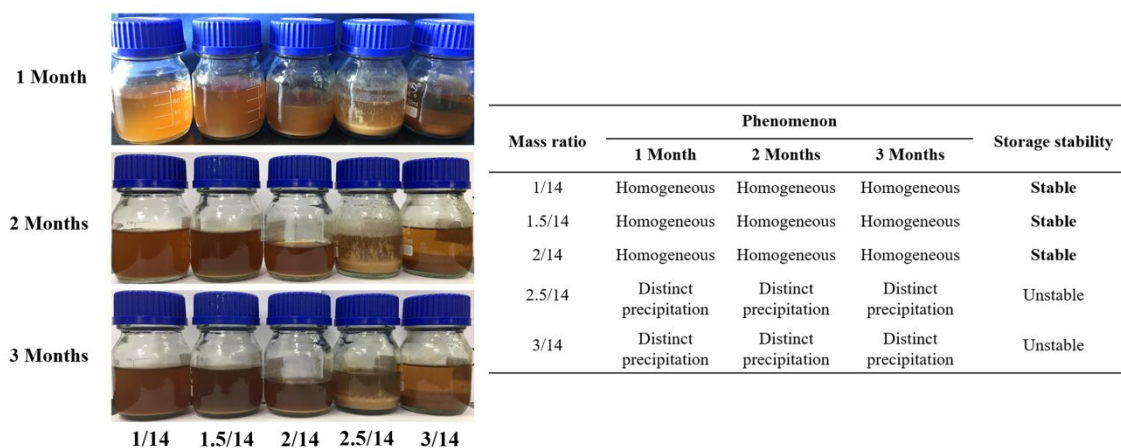

**Figure S3.** Storage stability of CS-PAA prepared under different CS/AA weight ratios.

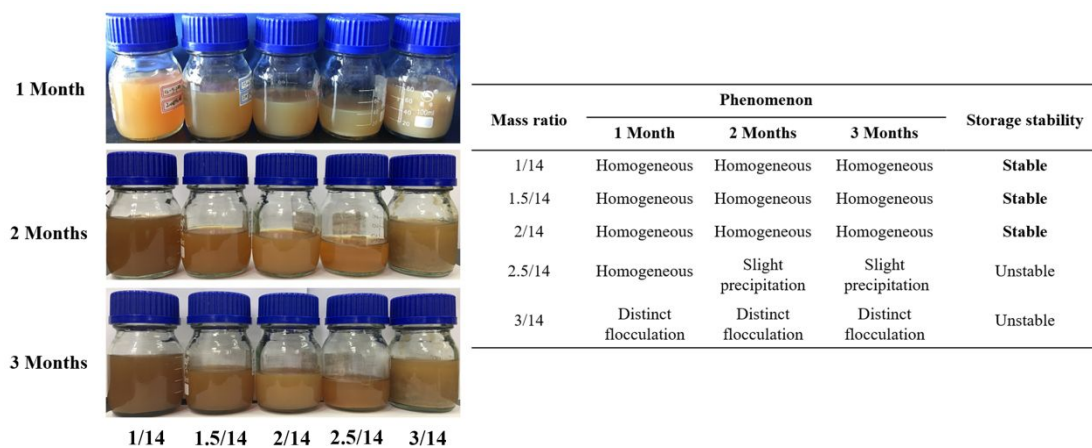

**Figure S4.** Storage stability of CS-PAANa prepared under different CS/AA weight ratios.

**Table S1.** Solubility of CS-PAA and CS-PAANa films in different solvents under 25 °C and 50 °C.

| Sample               | Soak for 18 hours<br>(25 °C) | Solubility | Soak for 18 hours<br>(50 °C) | Solubility |
|----------------------|------------------------------|------------|------------------------------|------------|
| CS-PAA<br>membrane   | Acetic acid solution (3 wt%) | Insoluble  | Acetic acid solution (3 wt%) | Insoluble  |
|                      | DMSO                         |            | DMSO                         |            |
|                      | NMP                          |            | NMP                          |            |
|                      | MeOH                         |            | MeOH                         |            |
| CS-PAANa<br>membrane | Acetic acid solution (3 wt%) | Insoluble  | Acetic acid solution (3 wt%) | Insoluble  |
|                      | DMSO                         |            | DMSO                         |            |
|                      | NMP                          |            | NMP                          |            |
|                      | MeOH                         |            | MeOH                         |            |

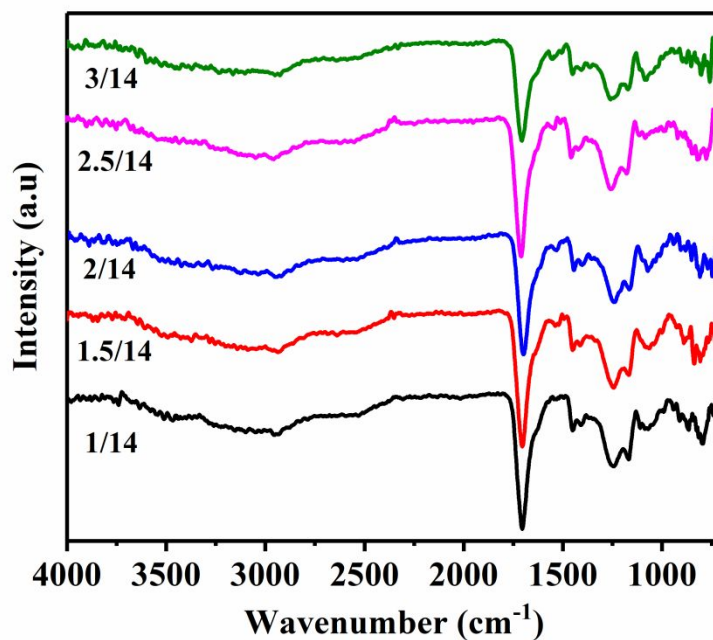

**Figure S5.** FT-IR spectra of CS-PAA binder films with different CS/AA weight ratios.

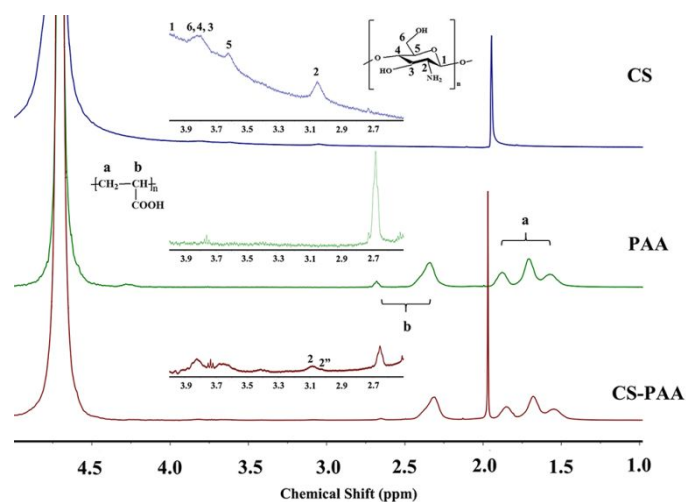

**Figure S6.**  $^1\text{H}$ -NMR spectra of CS, PAA, and CS-PAA binders.

The  $^1\text{H}$ -NMR spectra of CS, PAA, and CS-PAA binders are shown in **Figure S6**, Proton signals at 3.0-3.1 ppm (C-2), 3.5-3.7 ppm (C-5), 3.7-3.9 ppm (C-6, 4, 3) and 3.9-4.0 ppm (C-1) are observed, which conform to the  $^1\text{H}$ -NMR spectrum of CS as a reference.<sup>[1-3]</sup> The proton signals at 1.4-1.9 (a) and 2.2-2.8 (b) ppm in PAA are attributed to the protons of the acrylic unit.<sup>[4]</sup> For CS-PAA, all proton signals for CS and PAA are observed after graft polymerization. Meanwhile, a shifted proton signal ( $\sim 3.0$  ppm) is detected, corresponding to the reaction of PAA onto C2-NH<sub>2</sub> of CS.<sup>[5,6]</sup>

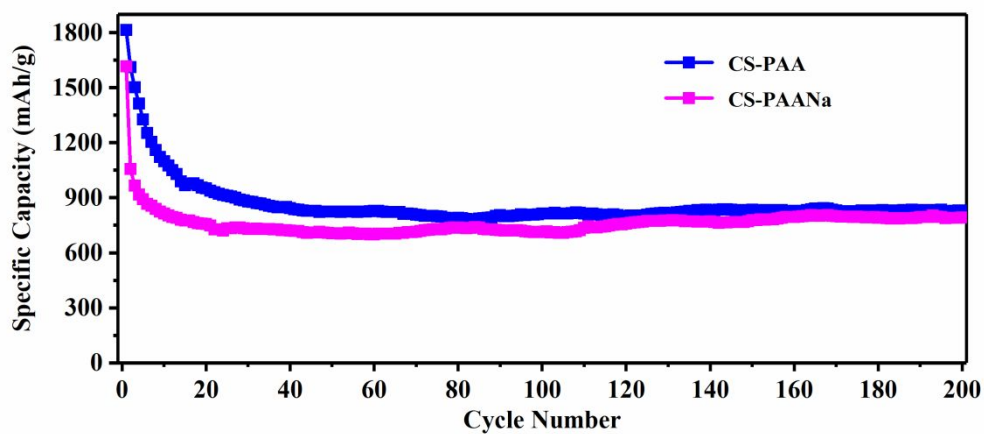

**Figure S7.** Cycling performance of electrodes at 2.7 A/g (mass loading is  $\sim 0.3$  mg).

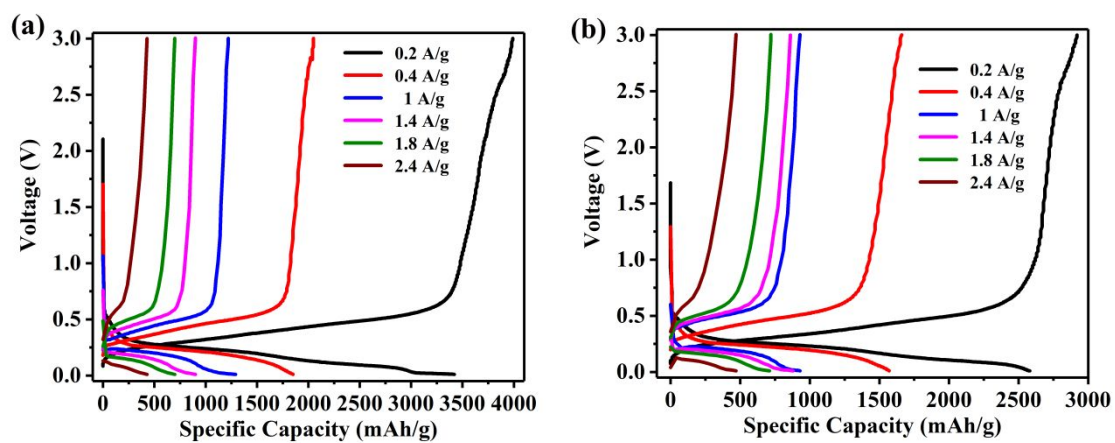

**Figure S8.** Galvanostatic voltage profiles of (a) Si/CS-PAA and (b) Si/CS-PAANa electrodes (mass loading is  $\sim 1$  mg).

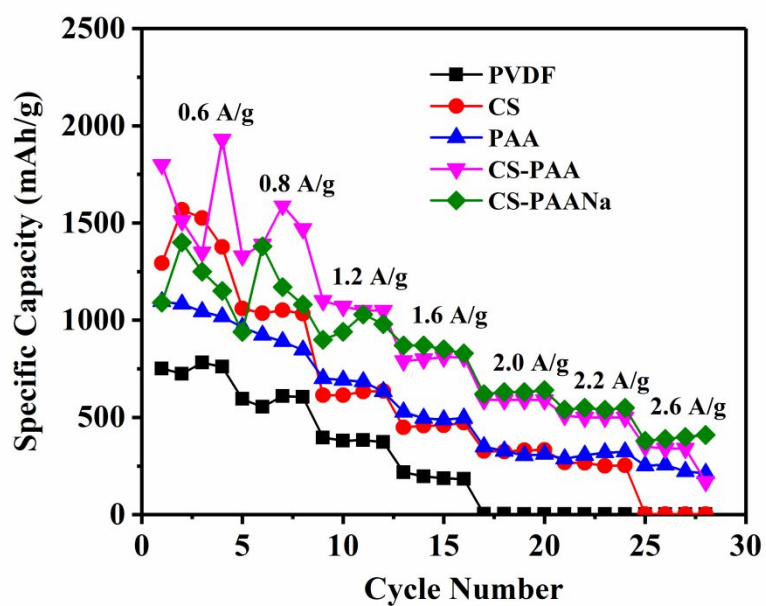

**Figure S9.** Rate performance of Si/PVDF, Si/CS, Si/PAA, Si/CS-PAA, and Si/CS-PAANa

electrodes (mass loading is ~1 mg).

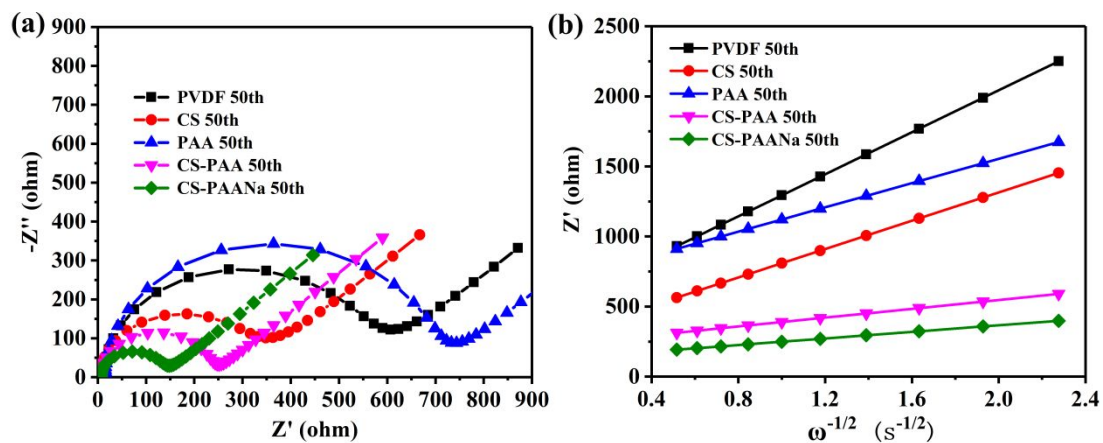

**Figure S10.** Electrochemical impedance spectra (a) and the plots of  $Z_{re}$  vs  $\omega^{-1/2}$  for Si/PVDF, Si/CS, Si/PAA, Si/CS-PAA and Si/CS-PAANa electrodes after 50 cycles (b).

**Table S2.** Impedance parameters of Si/PVDF, Si/CS, Si/PAA, Si/CS-PAA and Si/CS-PAANa

electrodes after 50 cycles.

| Sample        | $R_s$ ( $\Omega$ ) | $R_{ct}$ ( $\Omega$ ) | Warburg coefficient | $D$ ( $\times 10^{-17}$ $\text{cm}^2 \text{s}^{-1}$ ) |
|---------------|--------------------|-----------------------|---------------------|-------------------------------------------------------|
| PVDF 50th     | 13.33              | 534.40                | 119.37              | 0.30                                                  |
| CS 50th       | 5.87               | 303.00                | 80.50               | 0.99                                                  |
| PAA 50th      | 15.29              | 674.2                 | 68.95               | 1.57                                                  |
| CS-PAA 50th   | 6.28               | 225.90                | 25.10               | 32.51                                                 |
| CS-PAANa 50th | 6.08               | 126.80                | 18.65               | 79.25                                                 |



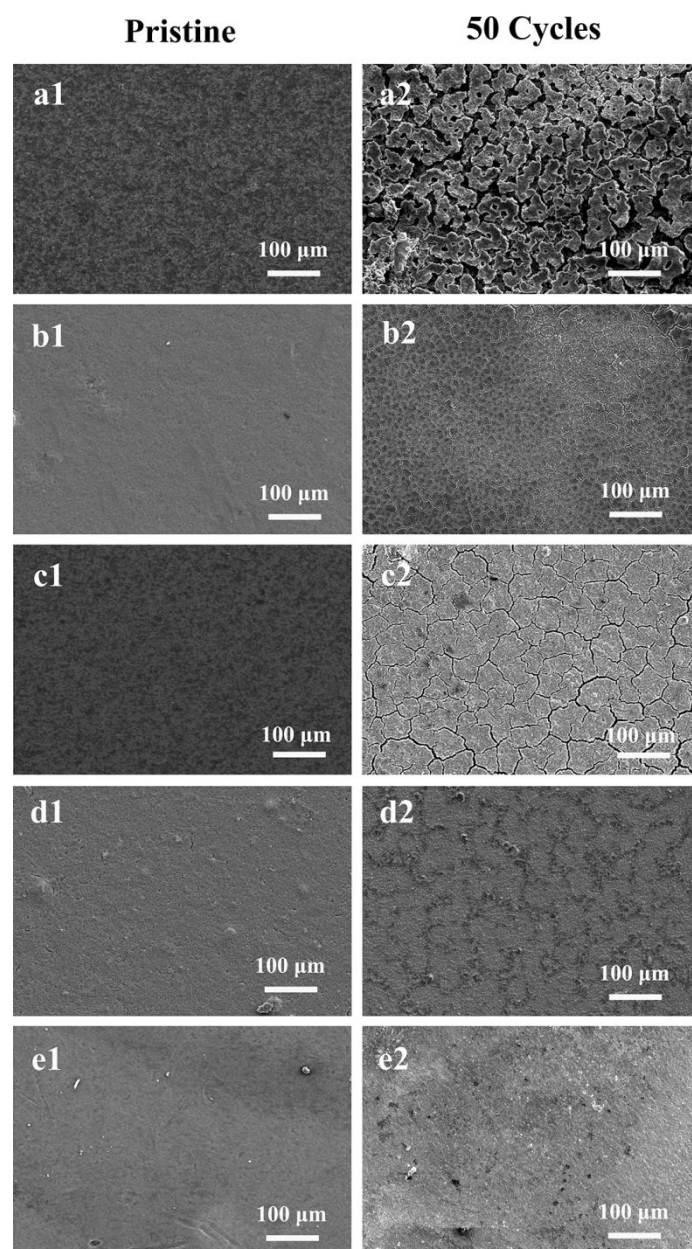

**Figure S11.** SEM images of (a) Si/PVDF, (b) Si/CS, (c) Si/PAA, (d) Si/CS-PAA and (e) Si/CS-PAA Na electrode surfaces at low magnification.

## Reference

- (1) Hirai, A.; Odani, H.; Nakajima, A. Determination of degree of deacetylation of chitosan by  $^1\text{H}$  NMR spectroscopy. *Polym. Bull.* **1991**, 26(1), 87-94.
- (2) Lu, H.; He, H.; Zhang, B.; Liu, G.; Li, M.; Nie, Q. Facile synthesis of amphiphilic chitosan-g-poly(lactic acid) derivatives and the study of their controlled drug release. *J. Appl. Polym. Sci.* **2013**, 130(2), 908-915.
- (3) Fernandez-Megia, E.; Novoa-Carballal, R.; Quiñoá, E.; Riguera, R. Optimal routine conditions for the determination of the degree of acetylation of chitosan by  $^1\text{H}$ -NMR. *Carbohydr. Polym.* **2005**, 61(2), 155-161.
- (4) Chen, S.; Wu, G.; Liu, Y.; Long, D. Preparation of Poly(acrylic acid) Grafted Multiwalled Carbon Nanotubes by a Two-Step Irradiation Technique. *Macromolecules* **2006**, 39(1), 330-334.
- (5) Liu, Y. Preparation, characterization and properties of biodegradable chitosan-poly (lactic acid) graft copolymer. *Fudan University*, **2010**, 47-48. (in Chinese)
- (6) Metzler, M.; Chylińska, M.; Kaczmarek, H. Preparation and characteristics of nanosilver composite based on chitosan-graft-acrylic acid copolymer. *J. Polym. Res.* **2015**, 22(8), 146.
